# Supplementary material for: Association of Mesothelioma Deaths With Cumulated Neighborhood Exposures Due to a Large-Scale Asbestos Cement Plant in Amagasaki City, Japan: A Nested Case-control Study
Source: Research Square preprint supplement (doi:10.21203/rs.3.rs-574038/v1), 2021-06-07
Supplement: Supplementary file 1 [file e783ae23521b4637364cee34.xlsx]

## Sheet: Supplementary
	Table 5. Characteristics of cases and controls (n = 433) by level of neighborhood asbestos exposure when only one address was selected from multiple residences by maximum or nearest residence in the nested case-control study in Amagasaki City, Japan.
				Level 1										Level 2										Level 3										Level 4										Level 5
				n = 75										n = 80										n = 77										n = 94										n = 117
				Cases					Controls					Cases					Controls					Cases					Controls					Cases					Controls					Cases					Controls
				n		(%)			n		(%)			n		(%)			n		(%)			n		(%)			n		(%)			n		(%)			n		(%)			n		(%)			n
	Maximum residence
		Subjects		6	(	100	)		69	(	100	)		12	(	100	)		68	(	100	)		8	(	100	)		69	(	100	)		26	(	100	)		68	(	100	)		49	(	100	)		68
		Duration, y
			0-4	3	(	50	)		15	(	21.7391	)		4	(	33.3333	)		6	(	8.82353	)		2	(	25	)		8	(	11.5942	)		3	(	11.5385	)		7	(	10.2941	)		5	(	10.2041	)		5
			5-9	1	(	16.6667	)		23	(	33.3333	)		2	(	16.6667	)		15	(	22.0588	)		4	(	50	)		8	(	11.5942	)		6	(	23.0769	)		15	(	22.0588	)		10	(	20.4082	)		19
			10-14	1	(	16.6667	)		14	(	20.2899	)		3	(	25	)		17	(	25	)		0	(	0	)		17	(	24.6377	)		8	(	30.7692	)		12	(	17.6471	)		8	(	16.3265	)		14
			15-18	1	(	16.6667	)		17	(	24.6377	)		3	(	25	)		30	(	44.1176	)		2	(	25	)		36	(	52.1739	)		9	(	34.6154	)		34	(	50	)		26	(	53.0612	)		30
		Simulated relative concentrations, 1/m3
			0- <3	6	(	100	)		69	(	100	)		12	(	100	)		68	(	100	)		7	(	87.5	)		67	(	97.1014	)		18	(	69.2308	)		51	(	75	)		1	(	2.04082	)		0
			3- <4	0	(	0	)		0	(	0	)		0	(	0	)		0	(	0	)		1	(	12.5	)		1	(	1.44928	)		2	(	7.69231	)		5	(	7.35294	)		3	(	6.12245	)		10
			4- <10	0	(	0	)		0	(	0	)		0	(	0	)		0	(	0	)		0	(	0	)		1	(	1.44928	)		4	(	15.3846	)		11	(	16.1765	)		20	(	40.8163	)		28
			10- <20	0	(	0	)		0	(	0	)		0	(	0	)		0	(	0	)		0	(	0	)		0	(	0	)		2	(	7.69231	)		1	(	1.47059	)		7	(	14.2857	)		13
			20- <40	0	(	0	)		0	(	0	)		0	(	0	)		0	(	0	)		0	(	0	)		0	(	0	)		0	(	0	)		0	(	0	)		10	(	20.4082	)		11
			40-	0	(	0	)		0	(	0	)		0	(	0	)		0	(	0	)		0	(	0	)		0	(	0	)		0	(	0	)		0	(	0	)		8	(	16.3265	)		6
		Residence-specific exposure,a y/m3
			Level 1: 0 - <2.426	6	(	100	)		69	(	100	)		4	(	33.3333	)		12	(	17.6471	)		0	(	0	)		0	(	0	)		0	(	0	)		0	(	0	)		0	(	0	)		0
			Level 2: 2.426 - <6.747	0	(	0	)		0	(	0	)		8	(	66.6667	)		56	(	82.3529	)		4	(	50	)		16	(	23.1884	)		0	(	0	)		0	(	0	)		0	(	0	)		0
			Level 3: 6.747 - <15.780	0	(	0	)		0	(	0	)		0	(	0	)		0	(	0	)		4	(	50	)		53	(	76.8116	)		5	(	19.2308	)		9	(	13.2353	)		0	(	0	)		0
			Level 4: 15.780 - <55.327	0	(	0	)		0	(	0	)		0	(	0	)		0	(	0	)		0	(	0	)		0	(	0	)		21	(	80.7692	)		59	(	86.7647	)		4	(	8.16327	)		8
			Level 5: ≥55.327	0	(	0	)		0	(	0	)		0	(	0	)		0	(	0	)		0	(	0	)		0	(	0	)		0	(	0	)		0	(	0	)		45	(	91.8367	)		60
	Nearest residence
		Distance from the plant premises, m
			2000-	6	(	100	)		67	(	97.1014	)		12	(	100	)		65	(	95.5882	)		4	(	50	)		57	(	82.6087	)		9	(	34.6154	)		33	(	48.5294	)		2	(	4.08163	)		2
			1500- <2000	0	(	0	)		2	(	2.89855	)		0	(	0	)		3	(	4.41176	)		2	(	25	)		7	(	10.1449	)		5	(	19.2308	)		7	(	10.2941	)		4	(	8.16327	)		10
			1000- <1500	0	(	0	)		0	(	0	)		0	(	0	)		0	(	0	)		2	(	25	)		2	(	2.89855	)		8	(	30.7692	)		12	(	17.6471	)		15	(	30.6122	)		20
			500- <1000	0	(	0	)		0	(	0	)		0	(	0	)		0	(	0	)		0	(	0	)		3	(	4.34783	)		4	(	15.3846	)		15	(	22.0588	)		15	(	30.6122	)		21
			0- <500	0	(	0	)		0	(	0	)		0	(	0	)		0	(	0	)		0	(	0	)		0	(	0	)		0	(	0	)		1	(	1.47059	)		13	(	26.5306	)		15
		Median (Range), m		4242 (4014-5629)					4071 (1994-6268)					3200 (2010-4920)					3074 (1758-4905)					1822 (1153-3533)					3172 (864-5331)					1667 (726-2794)					1839 (347-3514)					915 (165-2301)					929 (198-2357)
	a The cut-off values of each quintile were calculated by concentration times duration among controls.
[truncated: 11 more columns]
